# Supplementary material for: Exploring Bacterial Cellulose and a Biosurfactant as Eco-Friendly Strategies for Addressing Pharmaceutical Contaminants
Source: MDPI journal article supplement (doi:10.3390/molecules29020448), 2024-01-17
Supplement: s1 [file s1]

*Supplementary Material*

## **Exploring Bacterial Cellulose and a Biosurfactant as Eco-Friendly Strategies for Addressing Pharmaceutical Contaminants**

**Nathália Roberta Cardoso Mendes Castanho <sup>1</sup>, Nathane de Marco, Érika Leão Ajala Caetano, Patrícia Lius Melo Alves, Thaisa Borim Pickler, Natasha Lien de Almeida Ibanez, Angela Faustino Jozala \* and Denise Grotto \***

Department of Pharmacy, University of Sorocaba (UNISO), Sorocaba 18023-000, Brazil;  
nathalia.rcmc@gmail.com (N.R.C.M.C.); nathane.demarco@gmail.com (N.d.M.);  
erikacaetano01@hotmail.com (É.L.A.C.); 00105625@aluno.uniso.br (P.L.M.A.);  
thaisa.pickler@uniso.br (T.B.P.); natasha.lien@hotmail.com (N.L.d.A.I.)

\* Correspondence: angela.jozala@prof.uniso.br (A.F.J.); denise.grotto@prof.uniso.br (D.G.);  
Tel.: +55-15-2101-7104 (A.F.J. & D.G.); Fax: +55-15-2101-7000 (A.F.J. & D.G.)

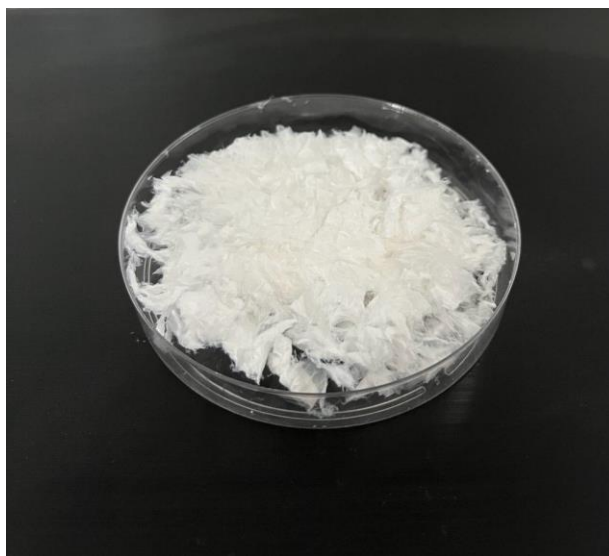

**Figure S1.** Crushed and lyophilized bacterial cellulose.
